# Supplementary material for: Minimal Mesoscale Model for Protein-Mediated Vesiculation in Clathrin-Dependent Endocytosis
Source: PubMed Central journal article supplement (PMC2936510; doi:10.1371/journal.pcbi.1000926), 2010-09-09
Supplement: pcbi.1000926.s004.pdf [file pcbi.1000926.s004.pdf]

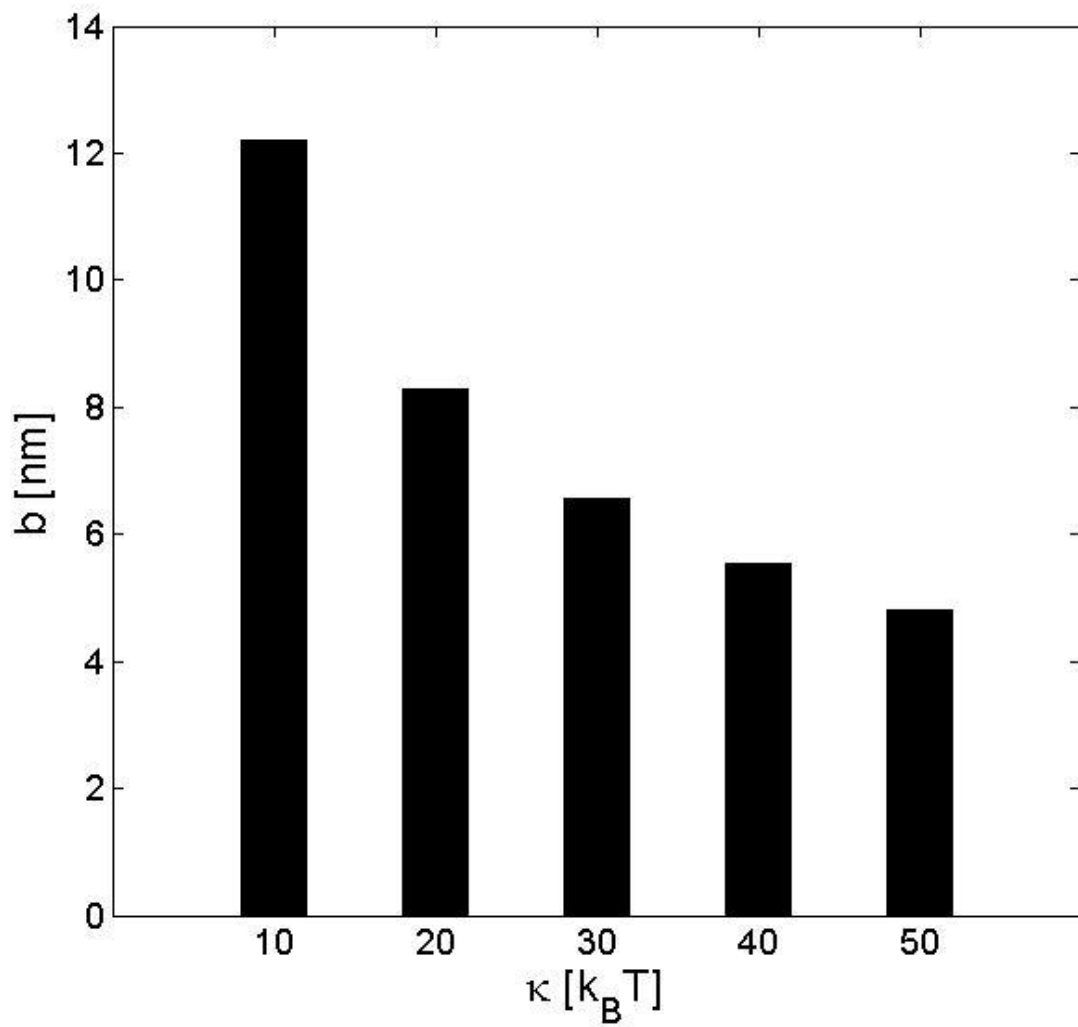

**Figure S4:** Epsin Shell Model- Determination of the range parameter  $b$  as a function of bending rigidity.
