# Supplementary material for: Minimal Mesoscale Model for Protein-Mediated Vesiculation in Clathrin-Dependent Endocytosis
Source: PubMed Central journal article supplement (PMC2936510; doi:10.1371/journal.pcbi.1000926), 2010-09-09
Supplement: pcbi.1000926.s005.pdf [file pcbi.1000926.s005.pdf]

a)

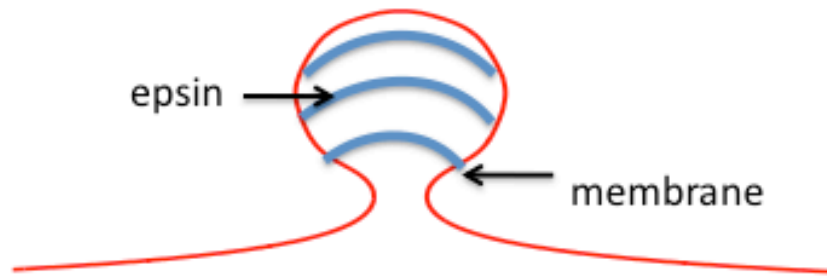

b)

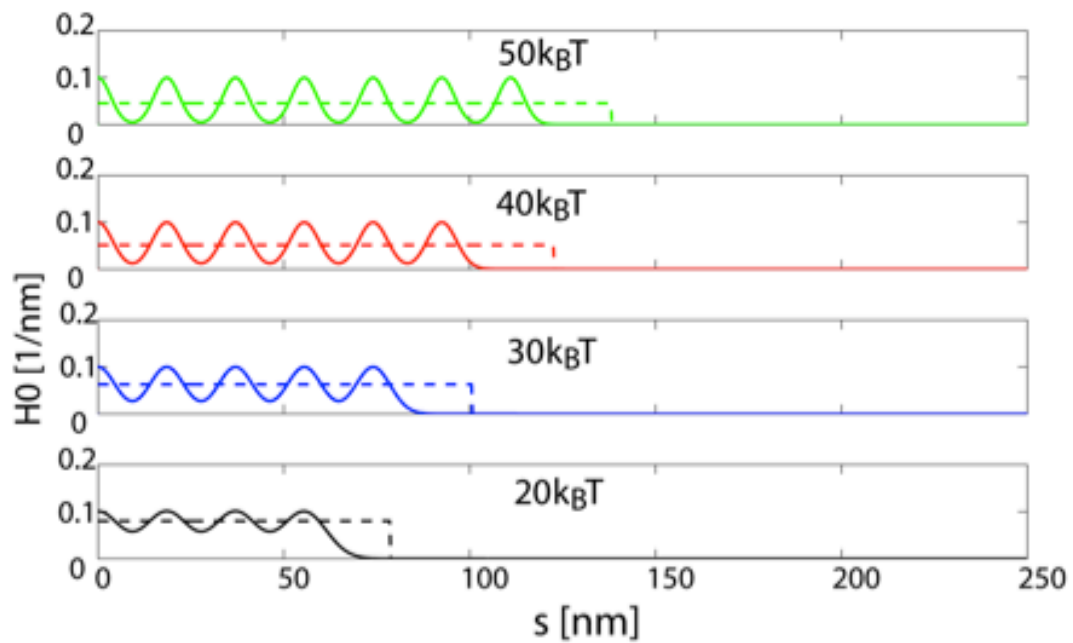

**Figure S5:** a) A schematic (corresponding to a mature bud in Fig. 3) showing membrane and three concentric shells of epsin present on the membrane. These shells of epsin are 18.5 nm (measured along the membrane arc-length,  $s$ ) far from each other. Each shell of epsin imposes an intrinsic curvature onto the membrane b)Epsin Shell Model- Comparison of curvature field functions in the epsin shell model (solid line) and the capsid model (dashed line).
