# Supplementary material for: Minimal Mesoscale Model for Protein-Mediated Vesiculation in Clathrin-Dependent Endocytosis
Source: PubMed Central journal article supplement (PMC2936510; doi:10.1371/journal.pcbi.1000926), 2010-09-09
Supplement: pcbi.1000926.s006.pdf [file pcbi.1000926.s006.pdf]

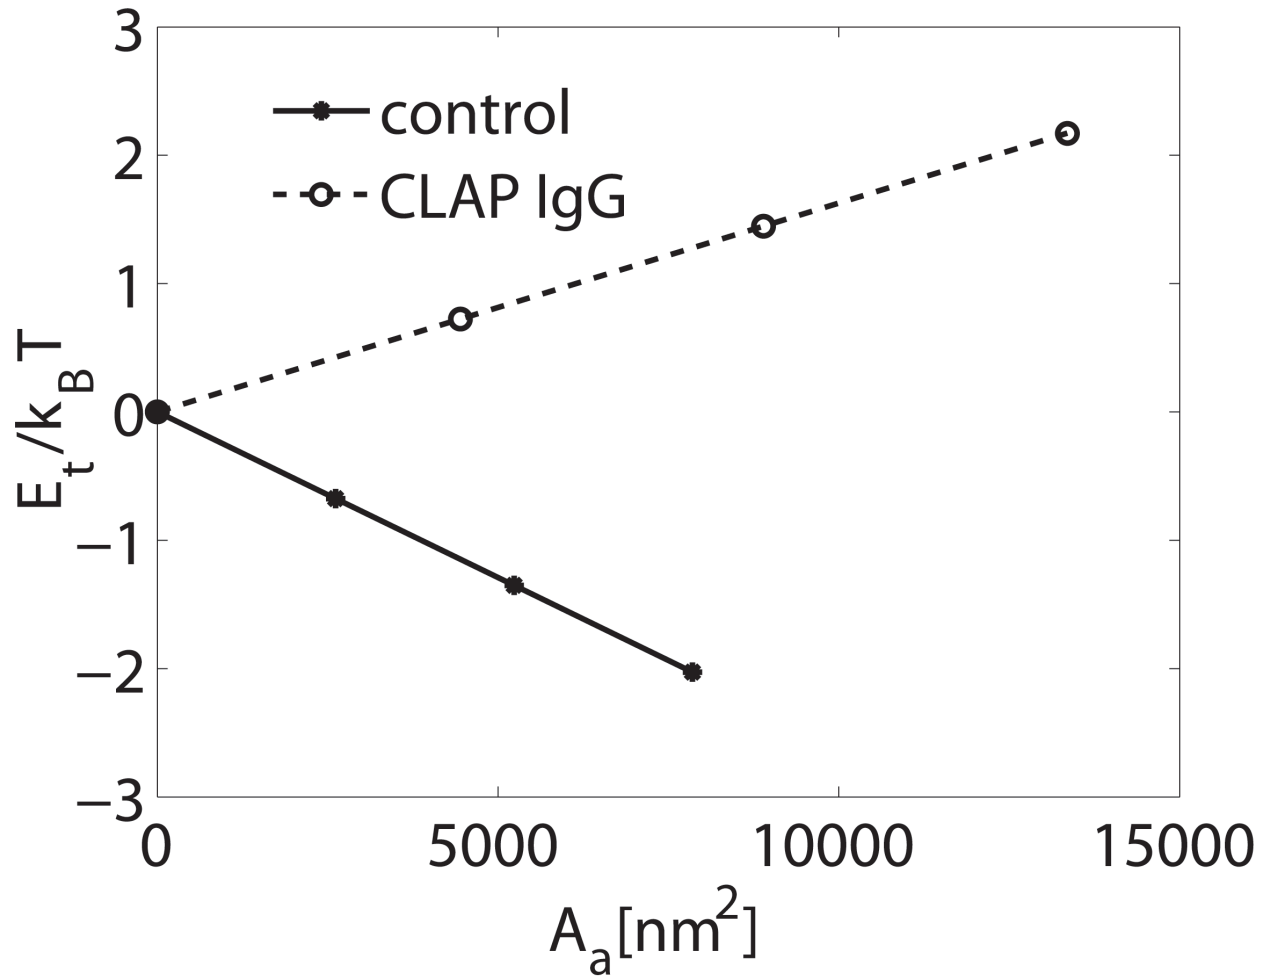

**Fig. S6.** Energetics of the clathrin coated vesicular bud  $E_t$  versus coat area,  $A_a$  for the capsid model.
